# Supplementary material for: X-ray Absorption Spectroscopy of Phosphine-Capped Au Clusters
Source: MDPI journal article supplement (doi:10.3390/inorganics11050191), 2023-04-28
Supplement: s1 [file s1]

# X-ray Absorption Spectroscopy of Phosphine capped Gold Clusters

Shailendra Kumar Sharma<sup>a, b</sup>, Bernt Johannessen<sup>c</sup>, Vladimir B. Golovko<sup>a\*</sup>, Aaron T. Marshall<sup>b\*</sup>

<sup>a</sup> School of Physical and Chemical Sciences, MacDiarmid Institute for Advanced Materials and Nanotechnology, University of Canterbury, Christchurch, New Zealand

<sup>b</sup> Department of Chemical and Process Engineering, MacDiarmid Institute for Advanced Materials and Nanotechnology, University of Canterbury, Christchurch, New Zealand

<sup>c</sup> Australian Synchrotron, ANSTO, Clayton VIC 3168, Australia.

## List of Figures

|                                                                                                                                                                                                                                                                                                                                                                                                  |    |
|--------------------------------------------------------------------------------------------------------------------------------------------------------------------------------------------------------------------------------------------------------------------------------------------------------------------------------------------------------------------------------------------------|----|
| Figure SI1. Crystal structures of (a) $[\text{Au}_6(\text{dppp})_4](\text{NO}_3)_2$ [1], (b) $[\text{Au}_9(\text{PPh}_3)_8](\text{NO}_3)_3$ [2], and (c) $[\text{Au}_{13}(\text{dppe})_5\text{Cl}_2]\text{Cl}_3$ [3]. The atomic colour scheme is gold (Au), orange (P), green (Cl) and black (C); hydrogen is omitted for clarity. ....                                                         | 3  |
| Figure SI2. XAS spectra of Au foil and Au clusters. ....                                                                                                                                                                                                                                                                                                                                         | 3  |
| Figure SI3. XANES spectra Au foil and Au clusters overlaid directly for comparison of the intensity ....                                                                                                                                                                                                                                                                                         | 4  |
| Figure SI4. UV-Vis spectra of (a) $[\text{Au}_6(\text{dppp})_4](\text{NO}_3)_2$ , (b) $[\text{Au}_9(\text{PPh}_3)_8](\text{NO}_3)_3$ , (c) $[\text{Au}_{13}(\text{dppe})_5\text{Cl}_2]\text{Cl}_3$ and (d) $\text{Au}_{101}(\text{PPPh}_3)_{21}\text{Cl}_5$ ; in methanol. ....                                                                                                                  | 4  |
| Figure SI5. Contribution of individual scattering paths in EXAFS of $\text{Au}_9$ (a) in R space, and (b) in k-space. ....                                                                                                                                                                                                                                                                       | 5  |
| Figure SI6. Fits of the magnitude of Fourier transform of Au $L_3$ -edge of $\text{Au}_9$ clusters without using scattering paths contributions from carbon atoms (a) in R-space, and (b) in k-space.....                                                                                                                                                                                        | 6  |
| Figure SI7. Fits of the magnitude of Fourier transform of Au $L_3$ -edge of $\text{Au}_9$ clusters using two aggregated shells of scattering paths from carbon atoms (a) R-space, and (b) k-space.....                                                                                                                                                                                           | 6  |
| Figure SI8. (a) Different types of Au atoms in $\text{Au}_6$ clusters, (b) groups of bonds with similar features, and (c) $\text{Au}_6$ clusters with different groups of atoms; light blue colour represents bonds in group 1, and violet colour represent bonds in group 2. The atomic colour scheme is gold (Au), orange (P) and black (C). All the carbon atoms are shown in Figure SI1..... | 7  |
| Figure SI9. Fits of the Au $L_3$ -edge EXAFS of $\text{Au}_6$ clusters in k-space. ....                                                                                                                                                                                                                                                                                                          | 8  |
| Figure SI10. Contribution of individual scattering paths in the EXAFS of $\text{Au}_6$ clusters in R-space.....                                                                                                                                                                                                                                                                                  | 9  |
| Figure SI11. The classification of bonds with similar features in the $\text{Au}_{13}$ cluster, and (b) $\text{Au}_{13}$ clusters with different groups of atoms light blue represents bonds in group 1, and violet colour represents bonds in group 2. The crystal structure of the clusters is shown in Figure SI1. ....                                                                       | 10 |
| Figure SI12. Fits the Au $L_3$ -edge EXAFS of the $\text{Au}_{13}$ clusters in k-space.....                                                                                                                                                                                                                                                                                                      | 11 |
| Figure SI13. Contribution of individual scattering paths in the EXAFS of $\text{Au}_{13}$ clusters in R-space. ....                                                                                                                                                                                                                                                                              | 12 |
| Figure SI14. Fits of the Au $L_3$ -edge EXAFS of $\text{Au}_{101}$ clusters in k-space. ....                                                                                                                                                                                                                                                                                                     | 12 |
| Figure SI15. Contribution of individual scattering paths in EXAFS of $\text{Au}_{101}$ (a) in R space.....                                                                                                                                                                                                                                                                                       | 13 |
| Figure SI16. EXAFS spectra with fixing Au-P coordination based on the empirical formula of $\text{Au}_{101}$ (i.e. $\text{Au}_{101}(\text{PPh}_3)_{21}\text{Cl}_5$ ) (a) fitted EXAFS, and (b) individual contribution from different scattering paths. ...                                                                                                                                      | 14 |
| Figure 17. Fits of the magnitude of Fourier transform of Au $L_3$ -edge of $\text{Au}_{101}$ clusters without Au-P scattering path.....                                                                                                                                                                                                                                                          | 14 |

## List of Tables

|                                                                                                                                                 |    |
|-------------------------------------------------------------------------------------------------------------------------------------------------|----|
| Table SI1. Bond distances between neighbouring Au-Au atoms in $\text{Au}_9$ clusters. ....                                                      | 5  |
| Table SI2. Bond distance and coordination numbers for bonds in each selected group of Au atoms in $\text{Au}_9$ clusters .....                  | 5  |
| Table SI3: . Structural characteristics of $\text{Au}_9$ clusters with no Au-C scattering path ( $\Delta E_0 = 3.812$ eV). ..                   | 6  |
| Table SI4: . Structural characteristics of $\text{Au}_9$ clusters with two Au-C scattering paths ( $\Delta E_0 = 3.716$ eV). ....               | 6  |
| Table SI5. Bond distances between neighbouring Au-Au atoms in $\text{Au}_6$ clusters.....                                                       | 8  |
| Table SI6. Structural characteristics of $\text{Au}_6$ clusters ( $\Delta E_0 = 2.737$ eV).....                                                 | 8  |
| Table SI7. Bond distances between neighbouring Au-Au atoms in $\text{Au}_{13}$ clusters.....                                                    | 9  |
| Table SI8. Structural characteristics of $\text{Au}_{13}$ clusters ( $\Delta E_0 = 4.574$ eV) .....                                             | 11 |
| Table SI9. Structural characteristics of $\text{Au}_{101}$ clusters ( $\Delta E_0 = 4.204$ eV). ....                                            | 13 |
| Table SI10. Structural characteristics of the $\text{Au}_{101}$ clusters after fixing Au-P coordination number ( $\Delta E_0 = 4.221$ eV). .... | 13 |

### Crystal structures of phosphine-capped Au clusters

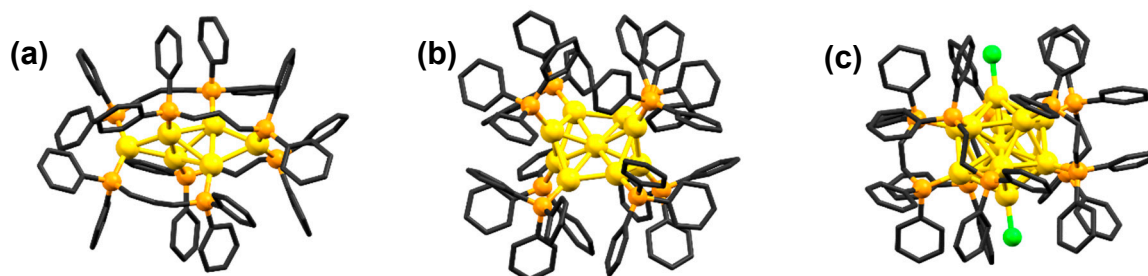

Figure S1. Crystal structures of (a)  $[\text{Au}_6(\text{dppp})_4](\text{NO}_3)_2$  [1], (b)  $[\text{Au}_9(\text{PPh}_3)_8](\text{NO}_3)_3$  [2], and (c)  $[\text{Au}_{13}(\text{dppe})_5\text{Cl}_2]\text{Cl}_3$  [3]. The atomic colour scheme is gold (Au), orange (P), green (Cl) and black (C); hydrogen is omitted for clarity.

### X-ray absorption spectra of Au clusters and gold foil

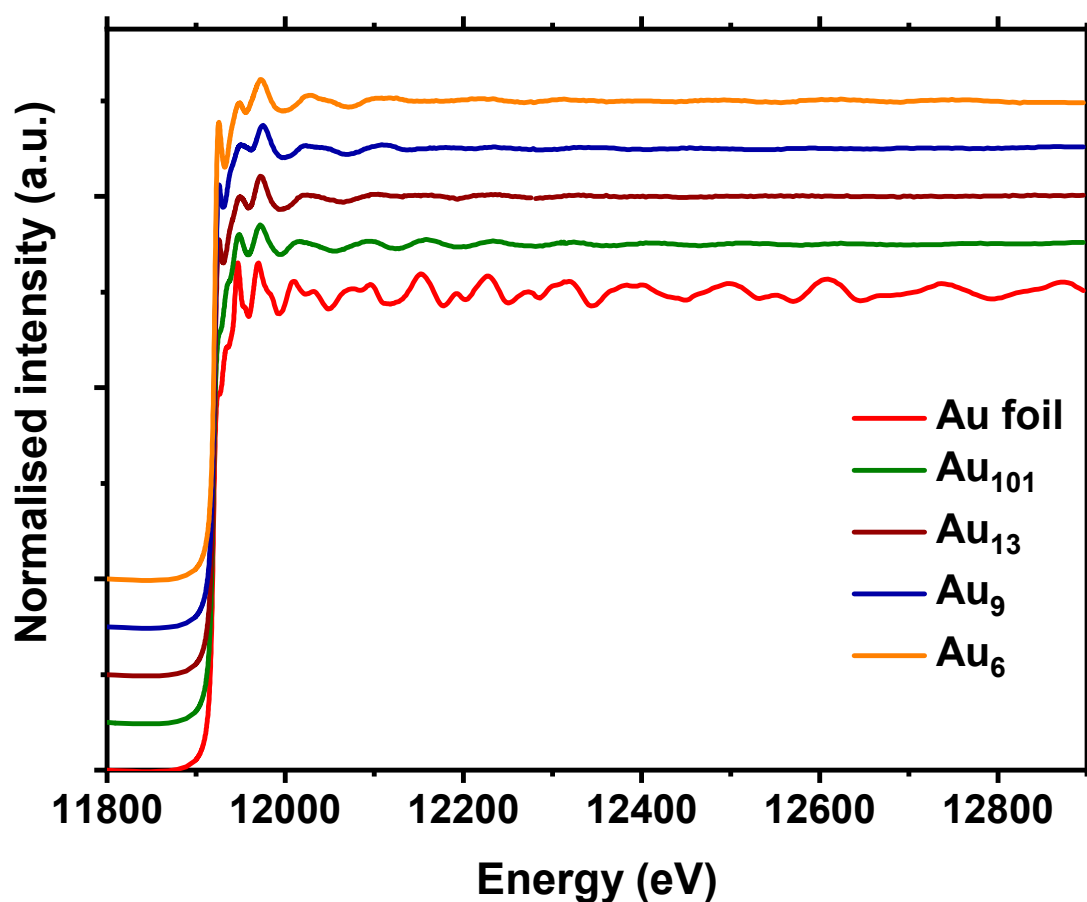

Figure S2. XAS spectra of Au foil and Au clusters.

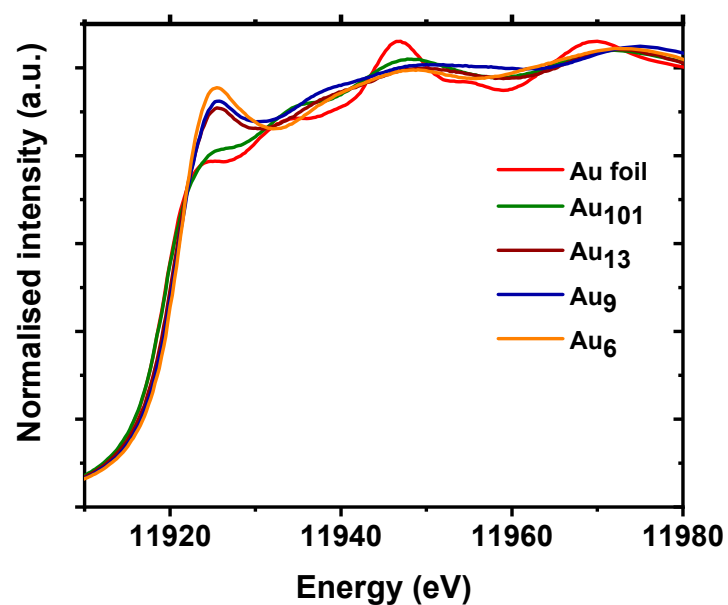

Figure S3. XANES spectra Au foil and Au clusters overlaid directly for comparison of the intensity

#### UV- Vis spectra of Au clusters

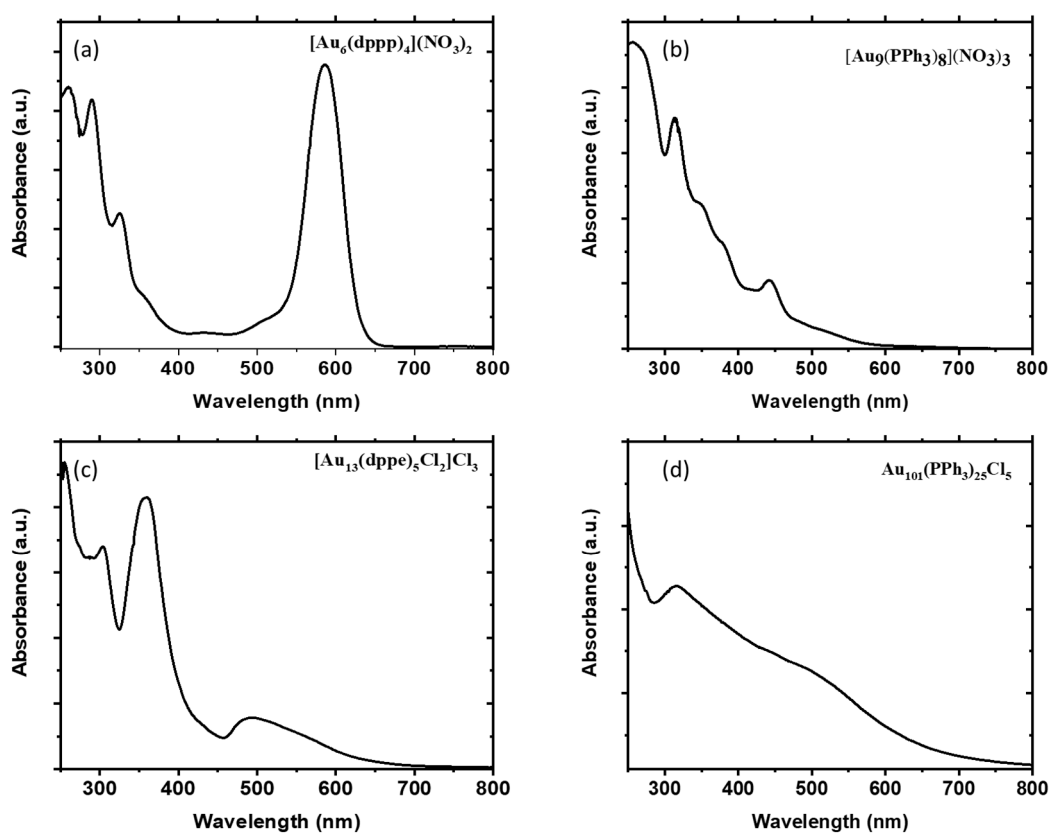

Figure S4. UV-Vis spectra of (a)  $[\text{Au}_6(\text{dppp})_4](\text{NO}_3)_2$ , (b)  $[\text{Au}_9(\text{PPh}_3)_8](\text{NO}_3)_3$ , (c)  $[\text{Au}_{13}(\text{dppe})_5\text{Cl}_2]\text{Cl}_3$  and (d)  $\text{Au}_{101}(\text{PPh}_3)_{25}\text{Cl}_5$ ; in methanol.

## EXAFS of Au clusters

### Au<sub>9</sub> clusters

Table S1. Bond distances between neighbouring Au-Au atoms in Au<sub>9</sub> clusters.

| Type of Au             | Number of atoms of this type | Bond length (Å)    |       |                    |       |
|------------------------|------------------------------|--------------------|-------|--------------------|-------|
|                        |                              | Au-Au              | Au-Au | Au-Au              | Au-Au |
| Au <sub>(1)</sub> type | 4                            | 2.708              | 2.772 | 2.855              | 2.880 |
| Au <sub>(2)</sub> type | 4                            | 2.675              | 2.762 | 2.855              | 2.880 |
| Au <sub>(3)</sub>      | 1                            | 4 Bonds of 2.675 Å |       | 4 Bonds of 2.708 Å |       |

Table S2. Bond distance and coordination numbers for bonds in each selected group of Au atoms in Au<sub>9</sub> clusters

| Bond length (Å) | No of bonds | Bonds per atom |               | Average Bond distance(Å) | CN    |
|-----------------|-------------|----------------|---------------|--------------------------|-------|
| 2.675           | 8           | 0.889          | Au-Au group 1 | 2.729                    | 2.667 |
| 2.708           | 8           | 0.889          |               |                          |       |
| 2.762           | 4           | 0.444          |               |                          |       |
| 2.772           | 4           | 0.444          |               |                          |       |
| 2.855           | 8           | 0.889          | Au-Au group 2 | 2.867                    | 1.778 |
| 2.880           | 8           | 0.889          |               |                          |       |

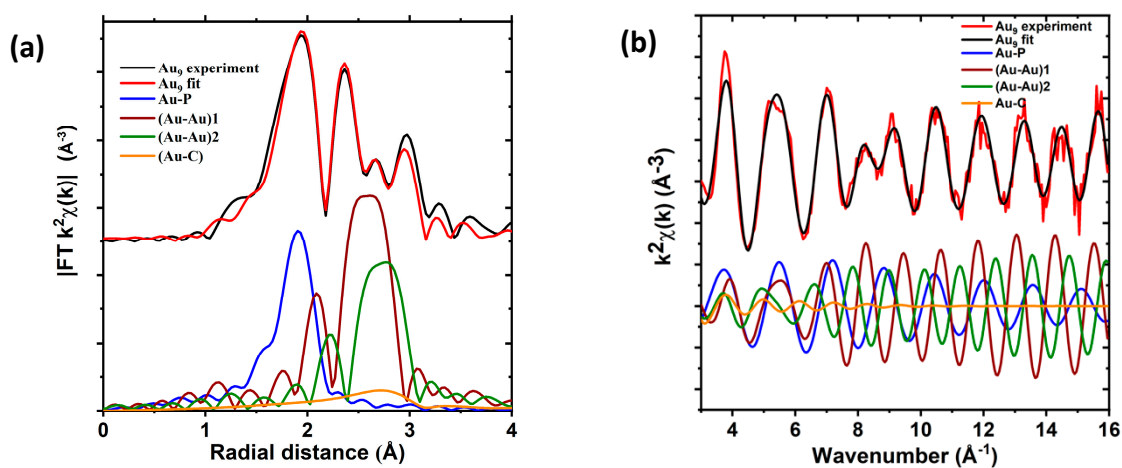

Figure S5. Contribution of individual scattering paths in EXAFS of Au<sub>9</sub> (a) in R space, and (b) in k-space.

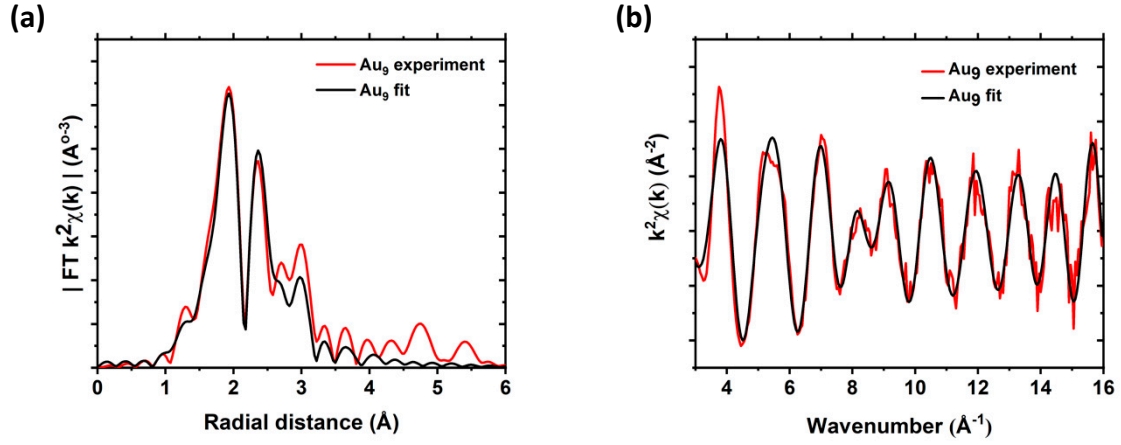

Figure S6. Fits of the magnitude of Fourier transform of Au L<sub>3</sub>-edge of Au<sub>9</sub> clusters without using scattering paths contributions from carbon atoms (a) in R-space, and (b) in k-space

Table S3: . Structural characteristics of Au<sub>9</sub> clusters with no Au-C scattering path ( $\Delta E_0 = 3.812$  eV).

| Paths                | CN (fixed) | $\sigma^2(\text{\AA}^2)$ | R (Å)               |
|----------------------|------------|--------------------------|---------------------|
| Au-P                 | 0.889      | $0.0008 \pm 0.0004$      | $2.2932 \pm 0.0112$ |
| (Au-Au) <sub>1</sub> | 2.667      | $0.0032 \pm 0.0006$      | $2.7101 \pm 0.0110$ |
| (Au-Au) <sub>2</sub> | 1.778      | $0.0027 \pm 0.0009$      | $2.8448 \pm 0.0145$ |

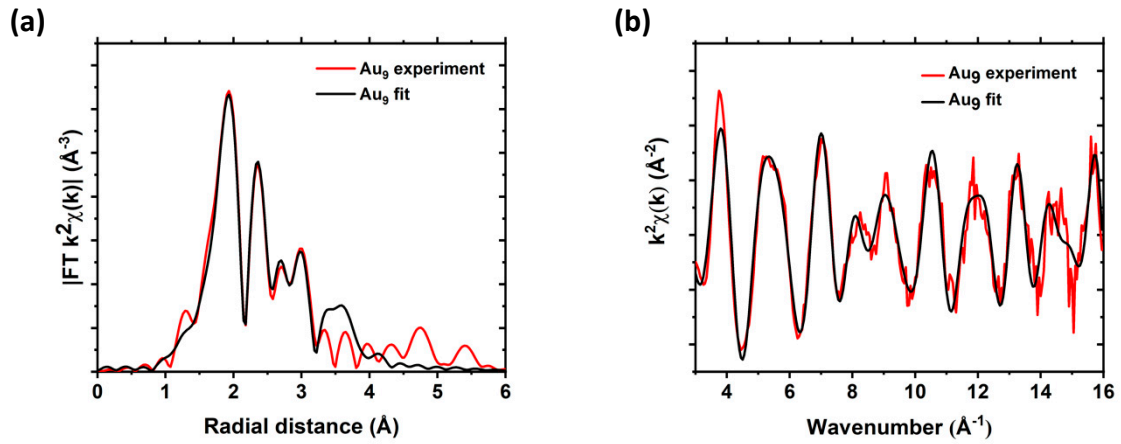

Figure S7. Fits of the magnitude of Fourier transform of Au L<sub>3</sub>-edge of Au<sub>9</sub> clusters using two aggregated shells of scattering paths from carbon atoms (a) R-space, and (b) k-space

Table S4: . Structural characteristics of Au<sub>9</sub> clusters with two Au-C scattering paths ( $\Delta E_0 = 3.716$  eV).

| Paths                | CN (fixed) | $\sigma^2(\text{\AA}^2)$ | R (Å)               |
|----------------------|------------|--------------------------|---------------------|
| Au-P                 | 0.889      | $0.0010 \pm 0.0004$      | $2.2946 \pm 0.0090$ |
| (Au-Au) <sub>1</sub> | 2.667      | $0.0035 \pm 0.0006$      | $2.7117 \pm 0.0103$ |
| (Au-Au) <sub>2</sub> | 1.778      | $0.0031 \pm 0.0009$      | $2.8403 \pm 0.0142$ |
| (Au-C) <sub>1</sub>  | 2.667      | $0.0080 \pm 0.0065$      | $3.4113 \pm 0.0532$ |
| (Au-C) <sub>2</sub>  | 1.778      | $0.0078 \pm 0.0062$      | $3.9001 \pm 0.0937$ |

## EXAFS analysis of Au<sub>6</sub>

(a)

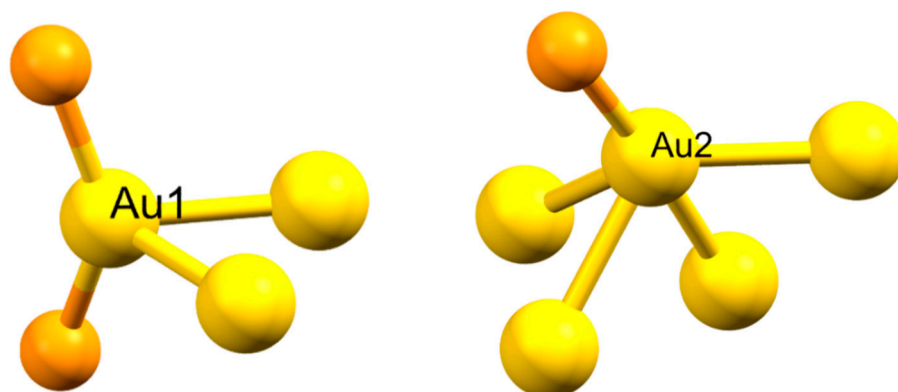

(b)

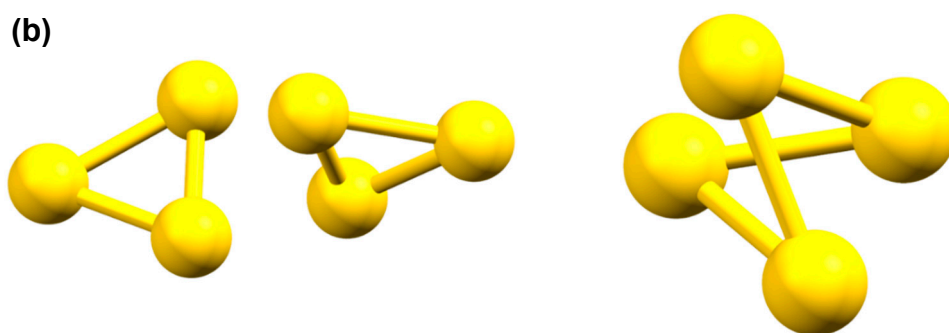

**Group 1**

**Group 2**

(c)

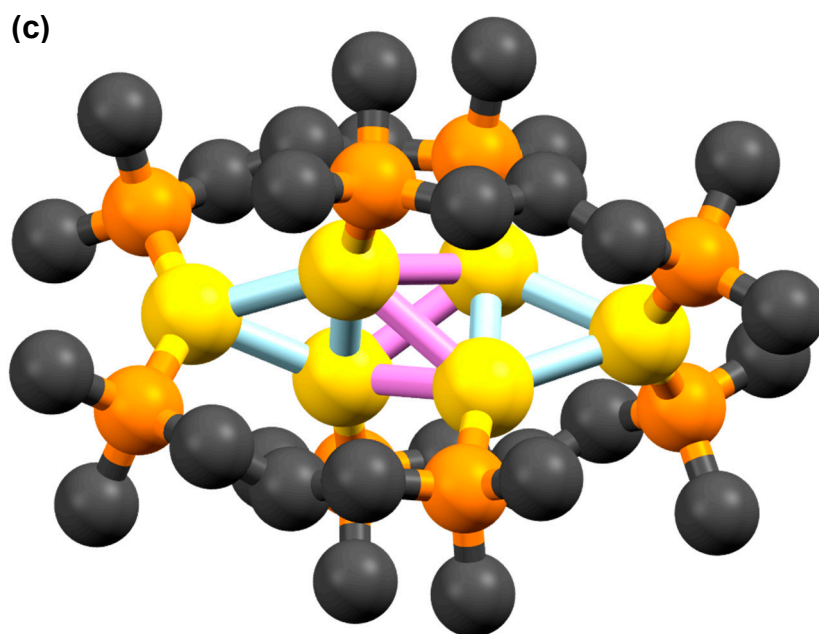

Figure S8. (a) Different types of Au atoms in Au<sub>6</sub> clusters, (b) groups of bonds with similar features, and (c) Au<sub>6</sub> clusters with different groups of atoms; light blue colour represents bonds in group 1, and violet colour represent bonds in group 2. The atomic colour scheme is gold (Au), orange (P) and black (C). All the carbon atoms are shown in Figure SI1.

Table S5. Bond distances between neighbouring Au-Au atoms in Au<sub>6</sub> clusters

| Type of Au        | Bond length (Å) |       |       |       |
|-------------------|-----------------|-------|-------|-------|
|                   | Au-Au           | Au-Au | Au-Au | Au-Au |
| Au <sub>(1)</sub> | 2.798           | 2.798 | -     | -     |
| Au <sub>(2)</sub> | 2.923           | 2.63  | 2.923 | 2.798 |

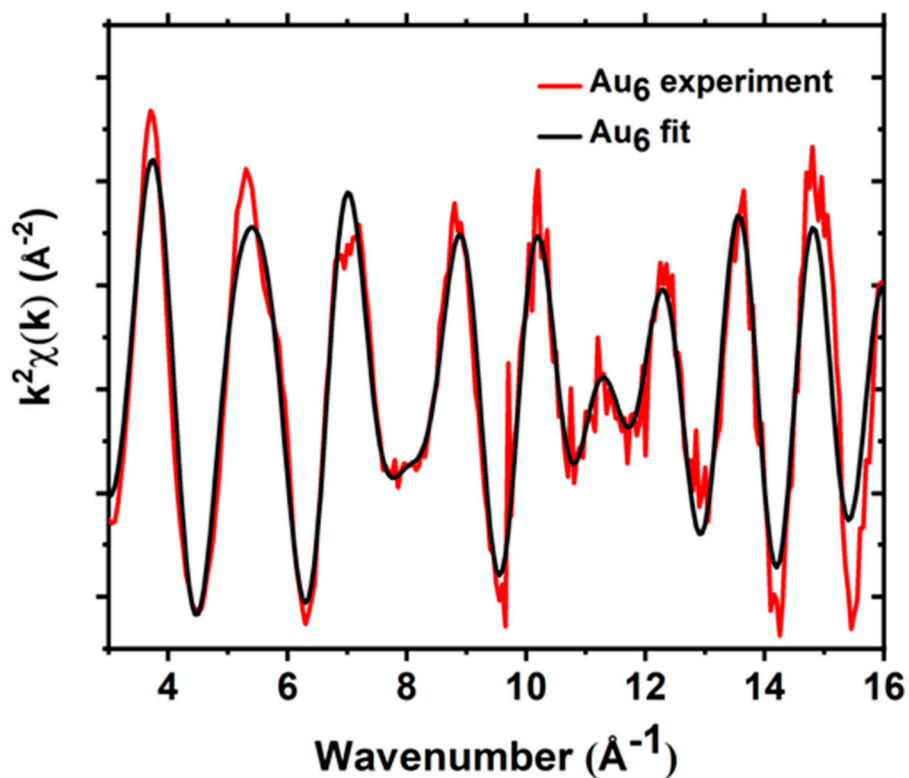

Figure S9. Fits of the Au L<sub>3</sub>-edge EXAFS of Au<sub>6</sub> clusters in k-space.

Table S6. Structural characteristics of Au<sub>6</sub> clusters ( $\Delta E_0 = 2.737$  eV)

| Path          | CN (fixed) | $\sigma^2(\text{\AA}^2)$ | R (Å)               |
|---------------|------------|--------------------------|---------------------|
| Au-P          | 1.333      | $0.0018 \pm 0.0006$      | $2.3080 \pm 0.0071$ |
| Au-Au group 1 | 2.000      | $0.0109 \pm 0.0005$      | $2.6602 \pm 0.0279$ |
| Au-Au group 2 | 1.333      | $0.0024 \pm 0.0005$      | $2.8337 \pm 0.0091$ |
| Au-C          | 2.667      | $0.0035 \pm 0.0021$      | $3.4791 \pm 0.0340$ |



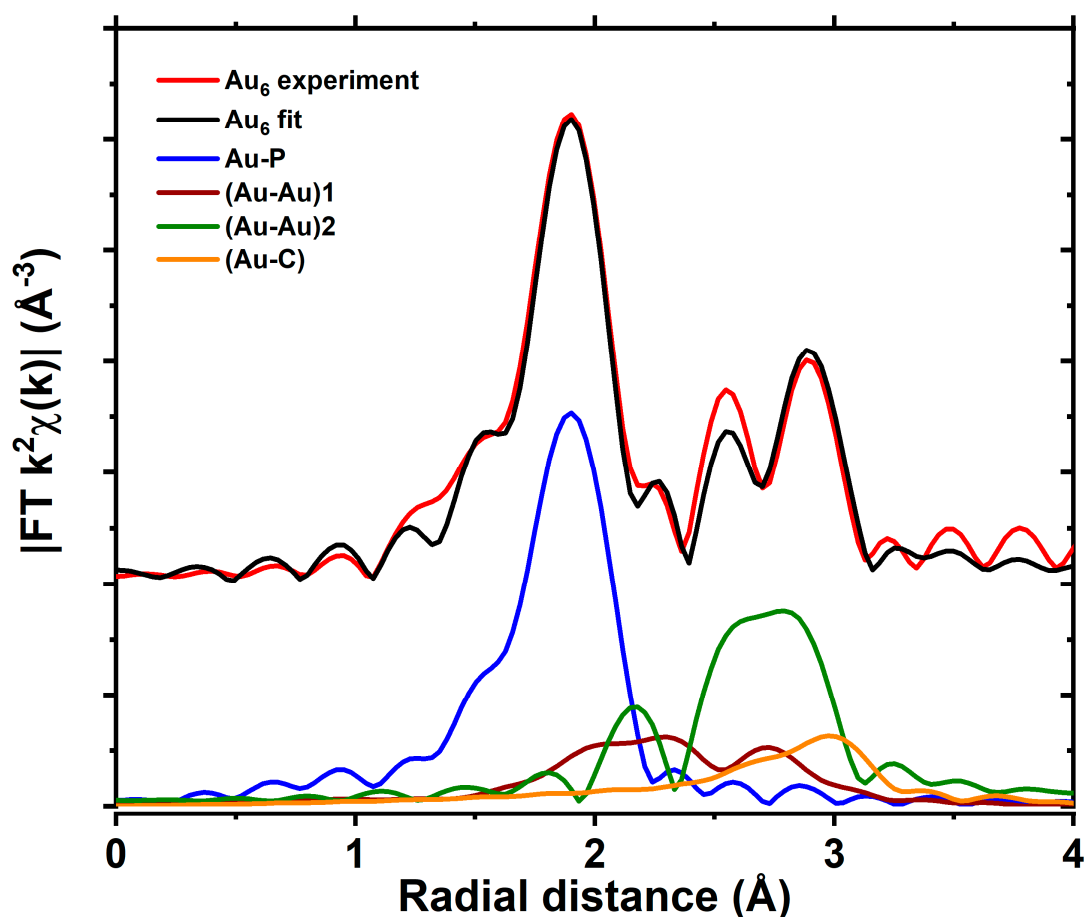

Figure S10. Contribution of individual scattering paths in the EXAFS of Au<sub>6</sub> clusters in R-space.

### EXAFS analysis of Au<sub>13</sub> clusters

Table S7. Bond distances between neighbouring Au-Au atoms in Au<sub>13</sub> clusters

| Au atom              | Au-P/Au-Cl (Å) | Au-Au bond length (Å) |       |       |       |       |                     |
|----------------------|----------------|-----------------------|-------|-------|-------|-------|---------------------|
|                      |                | with "surface" atoms  |       |       |       |       | with "central" atom |
| Au <sub>1</sub> -Cl  | 2.357          | 2.897                 | 2.858 | 2.939 | 2.927 | 2.89  | 2.696               |
| Au <sub>2</sub>      | 2.276          | 2.894                 | 2.848 | 2.929 | 2.974 | 2.858 | 2.759               |
| Au <sub>3</sub>      | 2.301          | 2.919                 | 2.855 | 2.974 | 2.955 | 2.897 | 2.786               |
| Au <sub>4</sub>      | 2.291          | 2.89                  | 2.94  | 2.892 | 2.889 | 2.955 | 2.783               |
| Au <sub>5</sub>      | 2.278          | 2.85                  | 2.884 | 2.911 | 2.927 | 2.94  | 2.758               |
| Au <sub>6</sub>      | 2.29           | 2.875                 | 2.894 | 2.939 | 2.911 | 2.875 | 2.798               |
| Au <sub>7</sub>      | 2.293          | 2.848                 | 2.917 | 2.924 | 2.885 | 2.923 | 2.773               |
| Au <sub>8</sub>      | 2.298          | 2.923                 | 2.924 | 2.945 | 2.855 | 2.929 | 2.782               |
| Au <sub>9</sub>      | 2.284          | 2.889                 | 2.919 | 2.945 | 2.871 | 2.906 | 2.757               |
| Au <sub>10</sub>     | 2.294          | 2.929                 | 2.958 | 2.85  | 2.892 | 2.906 | 2.792               |
| Au <sub>11</sub>     | 2.283          | 2.958                 | 2.873 | 2.924 | 2.875 | 2.884 | 2.781               |
| Au <sub>12</sub> -Cl | 2.345          | 2.871                 | 2.929 | 2.873 | 2.885 | 2.924 | 2.697               |

\*Au-Cl are the Au atoms bonded to chlorine atoms (Figure S1c)

(a)

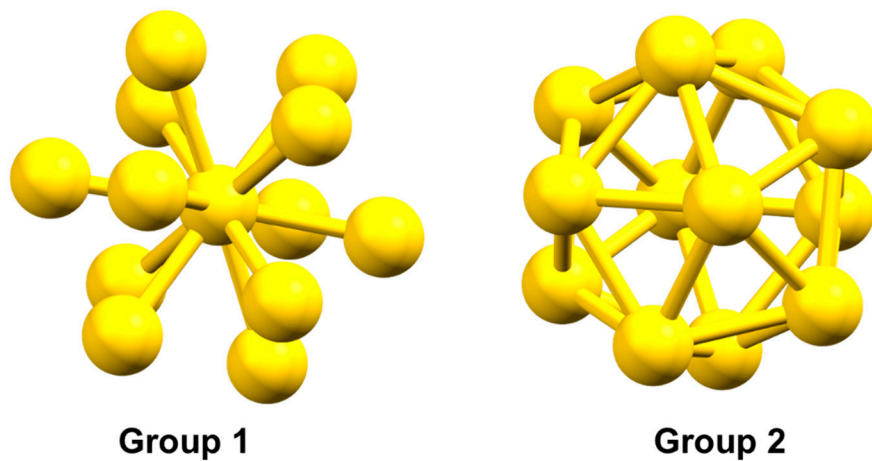

(b)

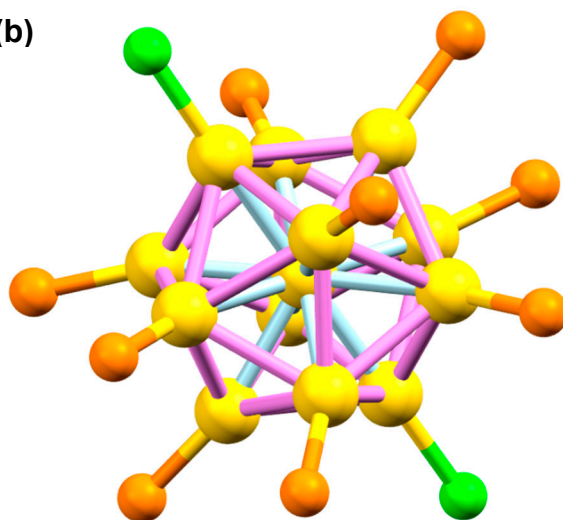

Figure S11. The classification of bonds with similar features in the Au<sub>13</sub> cluster, and (b) Au<sub>13</sub> clusters with different groups of atoms light blue represents bonds in group 1, and violet colour represents bonds in group 2. The crystal structure of the clusters is shown in Figure S11.

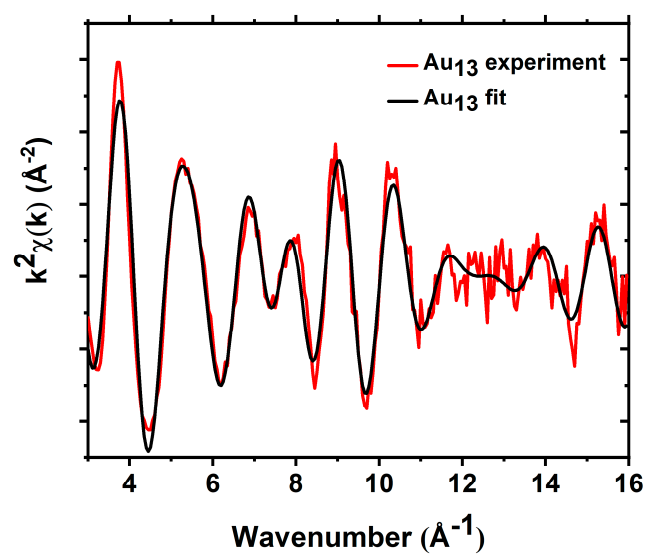

Figure S12. Fits the Au L<sub>3</sub>-edge EXAFS of the Au<sub>13</sub> clusters in k-space.

Table S8. Structural characteristics of Au<sub>13</sub> clusters ( $\Delta E_0 = 4.574$  eV)

| Path          | CN (fixed) | $\sigma^2$ (Å <sup>2</sup> ) | R (Å)            |
|---------------|------------|------------------------------|------------------|
| Au-P          | 0.769      | $0.0011 \pm 0.0006$          | $2.30 \pm 0.009$ |
| Au-Cl         | 0.154      | $0.0029 \pm 0.0003$          | $2.19 \pm 0.031$ |
| Au-Au group 1 | 1.846      | $0.0043 \pm 0.0005$          | $2.75 \pm 0.008$ |
| Au-Au group 2 | 4.615      | $0.0084 \pm 0.0008$          | $2.86 \pm 0.005$ |
| Au-C          | 1.923      | $0.0116 \pm 0.0082$          | $3.40 \pm 0.049$ |

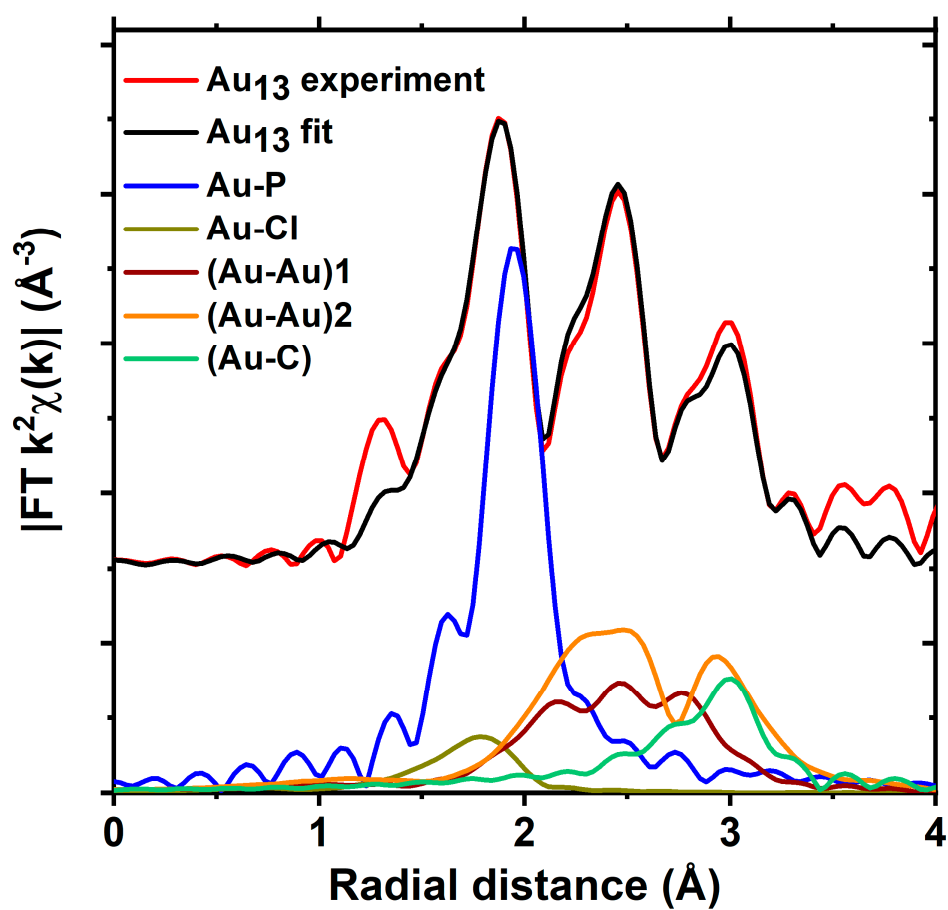

Figure S13. Contribution of individual scattering paths in the EXAFS of Au<sub>13</sub> clusters in R-space.

#### EXAFS analysis of Au<sub>101</sub>

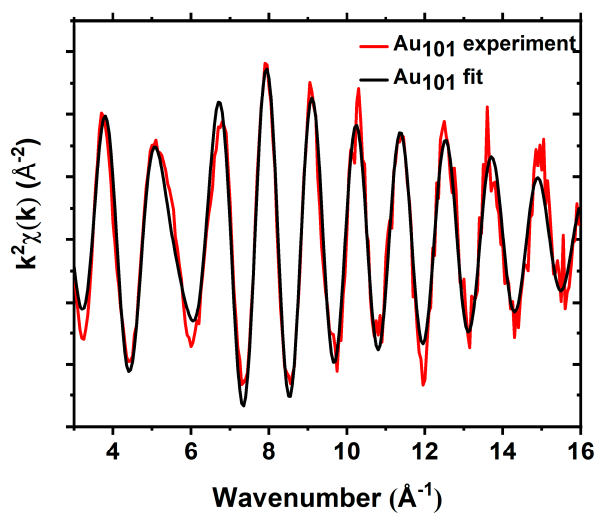

Figure S14. Fits of the Au L<sub>3</sub>-edge EXAFS of Au<sub>101</sub> clusters in k-space.

Table S9. Structural characteristics of Au<sub>101</sub> clusters ( $\Delta E_o = 4.204$  eV).

| Path  | CN              | $\sigma^2$ (Å <sup>2</sup> ) | R (Å)               |
|-------|-----------------|------------------------------|---------------------|
| Au-P  | $0.19 \pm 0.10$ | $0.0042 \pm 0.0020$          | $2.3000 \pm 0.0240$ |
| Au-Au | 7.68    0.38    | $0.0068 \pm 0.0003$          | $2.8160 \pm 0.0024$ |

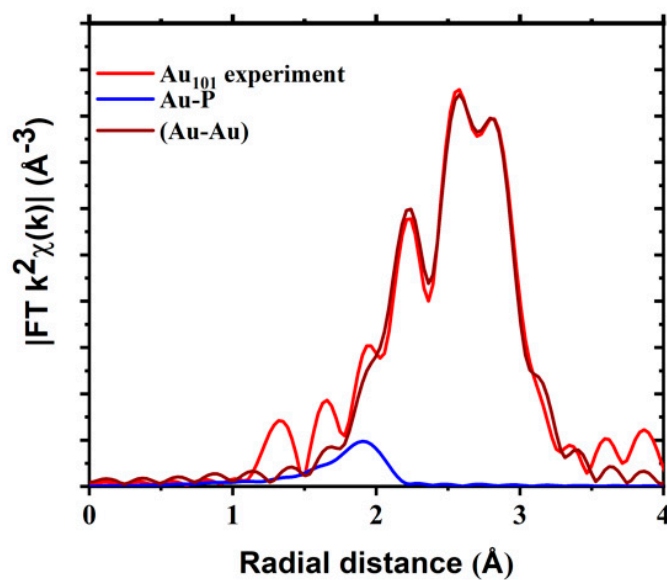

Figure S15. Contribution of individual scattering paths in EXAFS of Au<sub>101</sub> (a) in R space.

Table S10. Structural characteristics of the Au<sub>101</sub> clusters after fixing Au-P coordination number ( $\Delta E_o = 4.221$  eV).

| Path  | CN              | $\sigma^2$ (Å <sup>2</sup> ) | R (Å)               |
|-------|-----------------|------------------------------|---------------------|
| Au-P  | 0.208 (fixed)   | $0.0027 \pm 0.0020$          | $2.3000 \pm 0.0223$ |
| Au-Au | $7.68 \pm 0.34$ | $0.0068 \pm 0.0002$          | $2.8161 \pm 0.0227$ |

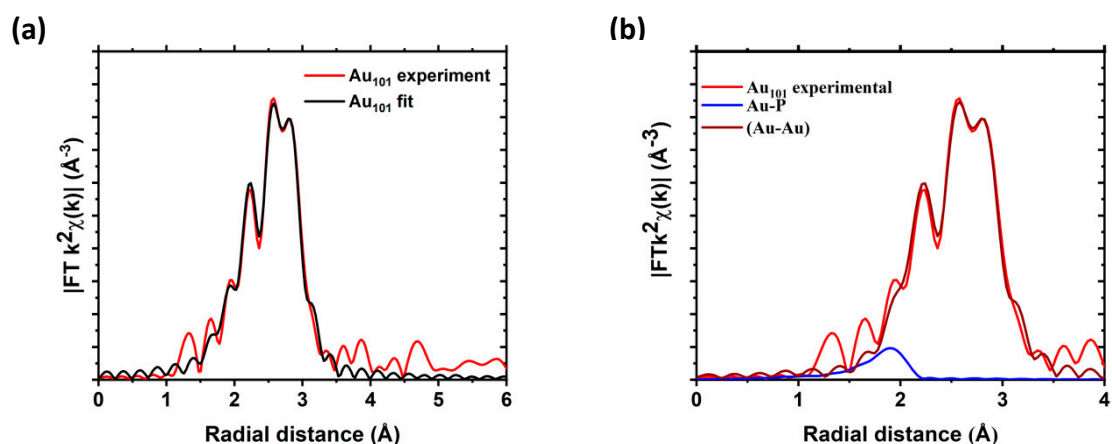

Figure S16. EXAFS spectra with fixing Au-P coordination based on the empirical formula of  $\text{Au}_{101}$  (i.e.  $\text{Au}_{101}(\text{PPh}_3)_{21}\text{Cl}_5$ ) (a) fitted EXAFS, and (b) individual contribution from different scattering paths.

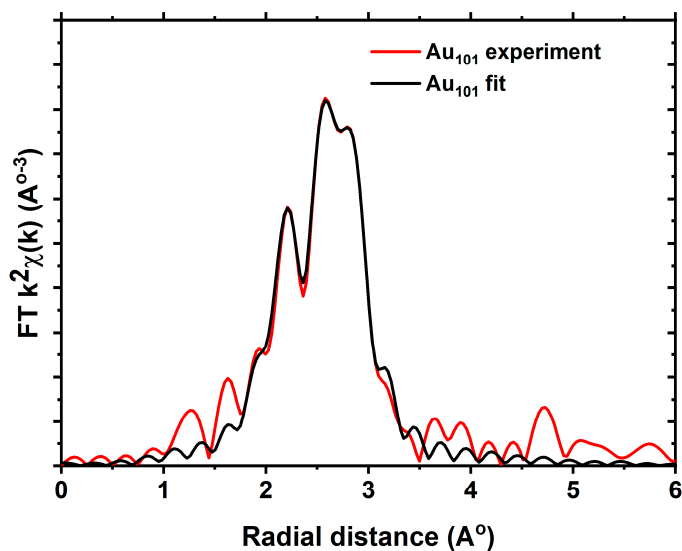

Figure S17. Fits of the magnitude of Fourier transform of  $\text{Au L}_{3\text{-edge}}$  of  $\text{Au}_{101}$  clusters without Au-P scattering path

Table S11. Structural characteristics of  $\text{Au}_{101}$  clusters without Au-P scattering path ( $\Delta E_0 = 4.67$ )

| Path  | CN              | $\sigma^2 (\text{\AA}^2)$ | R ( $\text{\AA}$ )  |
|-------|-----------------|---------------------------|---------------------|
| Au-Au | $7.56 \pm 0.39$ | $0.0068 \pm 0.0002$       | $2.8546 \pm 0.0027$ |

## References

1. Bakar, M.A.; Sugiuchi, M.; Iwasaki, M.; Shichibu, Y.; Konishi, K. Hydrogen bonds to Au atoms in coordinated gold clusters. *Nature Communications* **2017**, *8*, 576, doi:10.1038/s41467-017-00720-3.
2. Wen, F.; Englert, U.; Gutrath, B.; Simon, U. Crystal Structure, Electrochemical and Optical Properties of  $[\text{Au}_9(\text{PPh}_3)_8](\text{NO}_3)_3$ . *European Journal of Inorganic Chemistry* **2008**, *2008*, 106-111, doi:<https://doi.org/10.1002/ejic.200700534>.

3. Shichibu, Y.; Konishi, K. HCl-induced nuclearity convergence in diphosphine-protected ultrasmall gold clusters: a novel synthetic route to "magic-number" Au<sub>13</sub> clusters. *Small* **2010**, 6, 1216-1220, doi:10.1002/smll.200902398.
